# Supplementary material for: Spanish ecological battleground: population structure of two invasive fungi, Cryphonectria parasitica and Fusarium circinatum
Source: Front Plant Sci. 2023 Dec 21;14:1310254. doi: 10.3389/fpls.2023.1310254 (PMC10771289; doi:10.3389/fpls.2023.1310254)
Supplement: Supplementary Table 1 — The list of primers used in this study to analyse Cryphonectria parasitica and Fusarium circinatum. Ta refers to the annealing temperatures for each primer set. [file Table_1.xlsx]

## Sheet: Sheet1
Organism	Target region	Primer name	Sequence (5' to 3')	Primer concentration (uM)	Ta	Allele length	References
Fusarium circinatum	MAT-1	MAT1p2	AGAAACTGACTGATACATCAAGGGG	0.4	61	380	Wallace & Covert (2000)
		MAT1p3	TCATAAGAAGTGTTGAAGGAATCACAG
	MAT-2	GcHMG1	CTTTACCGTAAGGAGCGTCACCAT	0.4	61	190	Wallace & Covert (2000)
		GcHMG2	TGATCCGCCATCTGCTTGTAGAGT
	ITS	ITS1F	CTTGGTCATTTAGAGGAAGTAA	0.3	60	~600	Gardes & Bruns (1993)
		ITS4	TCCTCCGCTTATTGATATGC
Cryphonectria parasitica	ITS	UP18S42	CGTAACAAGGTTTCCGTAGGTGAAC	0.3	60	~650	Levesque and De Cook (2004)
		LO28S22	GTTTCTTTTCCTCCGCTTATTGATATG
	vic1a	vic1a-F	GCTATCCACCCTCACAGAGAA	0.315	62	Allele 1: 308	Short et al., (2015)
		vic1a-1R	CGTCCTGCCTCAAGGAGATT			Allele 2: 1470
		vic1a-2R	CATTTCGTCATCAGCACAAC
	vic2	vic2-F	TTGATGGTGGAGTGTGACAGA	0.315	60	Allele 1: 660	Short et al., (2015)
		vic2-1R	TCTCCCAATGACCTGAAATG			Allele 2: 1089
		vic2-2R	GATGTTTGGCATACATCGGC
	vic3a	vic3a-1F	CAGGTTTAGCAGGTTCTTCC	0.24	60	Allele 1: 538	Short et al., (2015)
		vic3a-2F	TCCATTGTCTCTATCCCATCC			Allele 2:1203
		vic3a-1R	GCACGACAAATGGCACTG
		vic3a-2R	GCATCAGGACTTGCCAGATA
	vic4	vic4-pF	GGTAGGATGACCTTTGCTGCT	0.315	63c	Allele 1: 386	Mlinarec et al., (2018)
		vic4-p1R	GATACTTGCGCAAAGAAGGCG			Allele 2: 705
		vic4-p2R	ACGGCGCAGAAATGAGGGGGT
	vic6	vic6-1F	CGCATACTGTGTTTCCCAACT	0.24	64	Allele 1: 238	Short et al., (2015)
		vic6-2F	ACAGGATAGCAATCACTGCC			Allele 2: 813
		vic6-1R	AAGATCCTTGCGTACCTCCA
		vic6-2R	ACAGGGAACTCTGGTCGTTG
	vic 7	vic 7-F	AGGTACACCCCCAAGATTCC	0.315	57.5	Allele 1: 728	Short et al., (2015)
		vic 7-1R	CCACGAAGTCTCTGGCGTA			Allele 2: 1109
		vic 7-2R	CAGGCTCGATTCTCAAGGTG
	MAT-1	M1GS1	GACATCACAAGTCGGCTCCCACGAACAG	0.2	66	2079	McGuire et al., (2001)
		M1GS2	GTGCTTTGTGTCGTGTATTAATCGCCGC
	MAT-2	M2GS2	GGAAGTTGGGTCCAAAATATGGGTACAG	0.2	63	~1700	Marra and Milgroom (1999)
		Inva5n	TGATGTCGGCAGCCTT
Ta	Annealing temperature
